# Supplementary material for: Development and application of a CRISPR/Cas12a-based reverse transcription–recombinase polymerase amplification assay with lateral flow dipstick and fluorescence detection for Getah virus
Source: PeerJ. 2025 Oct 2;13:e20119. doi: 10.7717/peerj.20119 (PMC12497397; doi:10.7717/peerj.20119)
Supplement: Supplemental Information 1 [file peerj-13-20119-s001.xls]

## Sheet: Sheet1
ITEM TO CHECK	IMPORTANCE	CHECKLIST	line number
EXPERIMENTAL DESIGN
Definition of experimental and control groups	E	To evaluate assay accuracy in the absence of natural GETV-positive samples from Liaoning Province, 36 simulated samples were generated by spiking GETV serum into 30 clinical sera using a blinded, randomized protocol. RNA was extracted using the TIANamp Viral DNA/RNA Kit (Tiangen) and stored at −20°C. All samples were independently tested via RT-RPA-CRISPR/Cas12a-LFD and quantitative PCR (qPCR) fo…	154-159
Number within each group	E	36 simulated samples
SAMPLE
Description	E	36 simulated samples were generated by spiking GETV serum into 30 clinical sera using a blinded, randomized protocol.	154-159
Microdissection or macrodissection	E	tail vein for blood sampling
Processing procedure	E	The blood was placed in a 37°C incubator for 1h and then centrifuged at 1500rmp for 15min before the supernatant serum was aspirated.
If frozen - how and how quickly?	E	All samples were stored in a -20°C refrigerator
NUCLEIC ACID EXTRACTION
Procedure and/or instrumentation	E	1. Take 10-200 μl of plasma, serum, cell-free body fluids, viral stock solutions, 10-100 μl of whole blood, or 200 μl if less than 200 μl is required. If the starting volume is less than 200 μl, make up 200 μl with PBS solution or RNase free dH2O. 2. 2. Add 200 μl of Buffer VGB, 20 μl of Proteinase K and 1.0 μl of Carrier RNA, mix thoroughly and incubate at 56℃ for 10 minutes. Mix well and incuba…	154-159；193-202
Name of kit and details of any modifications	E	TaKaRa MiniBEST Viral RNA/DNA Extraction Kit Ver.5.0	154-159；193-202
Instrument and method	E	Nucleic acid protein quantifier from THERMO, USA；2.5 μl of RNase free dH2OQ from the kit was taken as a blank control, after which 2.5 μl of the sample was added dropwise to the instrument for detection.	154-159；193-202
qPCR TARGET INFORMATION
The primers and reaction conditions in the RT-qPCR method were derived from the reverse transcription real-time quantitative PCR method for Getah virus detection established by Cao et al.[Cao X, Qiu X, Shi N, et al. Establishment of a reverse transcription real-time quantitative PCR method for Getah virus detection and its application for epidemiological investigation in Shandong, China. Front Mi…
primer sequence		(forward: 5′-AGCATTTTCGCATCTGGCTAC-3′) (reverse: 5′-TCTGGGTCTTCCGCACTTTT-3′)	154-159；193-202
reaction condition		1: 42°C for 5 min and 95°C for 10 s, 1 cycle, Stage 2: 95°C for 5 s and 60°C for 30 s, for each cycle, and Stage 3: 65–95°C, increment 5°C for 5 s. The RT-qPCR reaction conditions with the minimum Cq value	154-159；193-202
