# Supplementary material for: Development and application of a CRISPR/Cas12a-based reverse transcription–recombinase polymerase amplification assay with lateral flow dipstick and fluorescence detection for Getah virus
Source: PeerJ. 2025 Oct 2;13:e20119. doi: 10.7717/peerj.20119 (PMC12497397; doi:10.7717/peerj.20119)
Supplement: Supplemental Information 3 [file peerj-13-20119-s003.xlsx]

## Sheet: Sheet1
DNA plasimd copies	106	105	104	103	102	101	100	NC
Sample 1 Fluorescence	4900000	4550000	3000000	2560000	1100000	850000	0	0
Sample 2 Fluorescence	5000000	4800000	4000000	2700000	1000000	900000	100	0
Sample 3 Fluorescence	4800000	4300000	2900000	2400000	1300000	700000	50	0
